# Supplementary material for: Changes in Food Consumption, BMI, and Body Composition in Youth in the US during the COVID-19 Pandemic
Source: MDPI journal article supplement (doi:10.3390/ijerph20186796), 2023-09-21
Supplement: s1 [file s1]

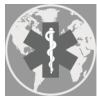

## Supplementary Materials

**Table S1.** Within-Group Differences in Total Energy Intake, BMI, BMIz, and Adiposity.

|                                 | No Pandemic Group |                                  |       |        | Pandemic Group     |                                  |       |       |
|---------------------------------|-------------------|----------------------------------|-------|--------|--------------------|----------------------------------|-------|-------|
|                                 | Baseline<br>M, SD | Difference <sup>1</sup><br>M, SD | t     | p      | Baseline<br>M, SD  | Difference <sup>1</sup><br>M, SD | t     | p     |
| <b>BMI</b>                      | 20.76, 4.69       | + 2.24, 2.44                     | -6.96 | <.001* | 22.57, 6.18        | + 1.66, 3.50                     | -3.20 | .003* |
| <b>BMIz</b>                     | 0.45, 0.94        | + 0.02, 0.49                     | -1.00 | .318   | 0.74, 1.10         | - 0.15, 0.56                     | 2.37  | .021* |
| <b>Adiposity (%)</b>            | 53.64, 10.39      | + 0.69, 6.24                     | -1.26 | .208   | 56.66, 10.10       | - 1.17, 5.83                     | 1.99  | .050* |
| <b>Energy Intake<br/>(kCal)</b> | 949.82,<br>424.31 | + 77.83,<br>407.70               | -2.85 | .005*  | 1046.47,<br>405.97 | + 174.43,<br>611.60              | -3.35 | .001* |

<sup>1</sup>Difference is the change between baseline and 3-year visit values calculated as 3-year visit minus baseline. \*Significance assuming  $\alpha=.05$ .

**Table S2.** Differences in the Change of Total Energy Intake Before and During the Pandemic.

| Covariates          | Total Energy Intake (kcal) Difference Score |       |                    |      |
|---------------------|---------------------------------------------|-------|--------------------|------|
|                     | Fully Adjusted                              |       | Partially Adjusted |      |
|                     | F                                           | p     | F                  | p    |
| Model               | 1.57                                        | 0.13  | 1.96               | 0.15 |
| Group               | 0.41                                        | 0.52  | 0.62               | 0.43 |
| Age                 | 2.20                                        | 0.14  | --                 | --   |
| Sex                 | 2.02                                        | 0.16  | --                 | --   |
| Race                | 0.01                                        | 0.94  | --                 | --   |
| Ethnicity           | 0.50                                        | 0.48  | --                 | --   |
| Height              | 1.33                                        | 0.25  | --                 | --   |
| Time Between Visits | <0.01                                       | 1.00  | --                 | --   |
| Lean Mass           | 0.92                                        | 0.34  | --                 | --   |
| Adiposity           | 6.18                                        | 0.02* | 2.89               | 0.09 |

Group was operationalized as No Pandemic (0) and Pandemic (1). \*Significance assuming  $\alpha=.05$ .

**Table S3.** BMI, BMIz, and Adiposity Differences at the 3-Year Visit Before and During the Pandemic.

| BMI        |                |        |                    |        |
|------------|----------------|--------|--------------------|--------|
| Covariates | Fully Adjusted |        | Partially Adjusted |        |
|            | F              | p      | F                  | p      |
| Model      | 5.37           | <.001* | 12.10              | <.001* |
| Group      | 0.58           | 0.45   | 0.66               | 0.42   |
| Age        | 21.62          | <.001* | 22.88              | <.001* |
| Sex        | 0.55           | 0.46   | --                 | --     |
| Race       | 1.64           | 0.20   | --                 | --     |
| Ethnicity  | 0.02           | 0.90   | --                 | --     |
| BMIz       |                |        |                    |        |
| Covariates | Fully Adjusted |        | Partially Adjusted |        |
|            | F              | p      | F                  | p      |
| Model      | 1.36           | 0.26   | N/A                | N/A    |
| Group      | 0.08           | 0.78   |                    |        |
| Race       | 3.00           | 0.09   |                    |        |
| Ethnicity  | 0.26           | 0.62   |                    |        |

|                   |                       |          |                           |          |
|-------------------|-----------------------|----------|---------------------------|----------|
| Height            | 2.11                  | 0.15     | Adiposity                 |          |
|                   | <b>Fully Adjusted</b> |          | <b>Partially Adjusted</b> |          |
| <b>Covariates</b> | <b>F</b>              | <b>p</b> | <b>F</b>                  | <b>p</b> |
| Model             | 5.05                  | <.001*   | 15.10                     | <.001*   |
| Group             | 0.05                  | 0.83     | 0.03                      | 0.86     |
| Age               | 0.50                  | 0.48     | --                        | --       |
| Sex               | 19.62                 | <.001*   | 30.11                     | <.001*   |
| Race              | 0.06                  | 0.81     | --                        | --       |
| Ethnicity         | 0.23                  | 0.63     | --                        | --       |
| Height            | 0.52                  | 0.47     | --                        | --       |

Group was operationalized as No Pandemic (0) and Pandemic (1). \*Significance assuming  $\alpha=.05$ .

**Table S4.** Change in Percent Calories from Protein Consumed with Covariates.

| <b>Fully Adjusted Model</b> |             |             |  |
|-----------------------------|-------------|-------------|--|
|                             | <b>F</b>    | <b>p</b>    |  |
| Model                       | 1.18        | 0.32        |  |
| <b>Group</b>                | <b>0.79</b> | <b>0.38</b> |  |
| Age                         | 0.15        | 0.70        |  |
| Sex assigned at Birth       | 0.71        | 0.40        |  |
| Height                      | 0.46        | 0.50        |  |
| Race                        | 0.08        | 0.79        |  |
| Ethnicity                   | 2.91        | 0.09        |  |
| Time Between Visits         | <0.01       | 0.99        |  |
| Lean Mass                   | 0.15        | 0.70        |  |
| Adiposity                   | 6.20        | 0.01*       |  |

Group was operationalized as No Pandemic (0) and Pandemic (1). \*Significance assuming  $\alpha=.05$ .

**Table S5.** Change in Percent Calories from Fat Consumed with Covariates.

| <b>Fully Adjusted Model</b> |             |             |  |
|-----------------------------|-------------|-------------|--|
|                             | <b>F</b>    | <b>p</b>    |  |
| Model                       | 1.43        | 0.19        |  |
| <b>Group</b>                | <b>0.12</b> | <b>0.74</b> |  |
| Age                         | 0.01        | 0.91        |  |
| Sex assigned at Birth       | 0.10        | 0.75        |  |
| Height                      | 0.05        | 0.83        |  |
| Race                        | 0.79        | 0.38        |  |
| Ethnicity                   | 4.53        | 0.04*       |  |
| Time Between Visits         | 0.03        | 0.86        |  |
| Lean Mass                   | <0.01       | 0.96        |  |
| Adiposity                   | 6.59        | 0.01*       |  |

Group was operationalized as No Pandemic (0) and Pandemic (1). \*Significance assuming  $\alpha=.05$ .

**Table S6.** Change in Percent Calories from Carbohydrates Consumed with Covariates.

| <b>Fully Adjusted Model</b> |             |             |  |
|-----------------------------|-------------|-------------|--|
|                             | <b>F</b>    | <b>p</b>    |  |
| Model                       | 1.06        | 0.40        |  |
| <b>Group</b>                | <b>1.45</b> | <b>0.23</b> |  |
| Age                         | 0.24        | 0.62        |  |
| Sex assigned at Birth       | <0.01       | 0.98        |  |
| Height                      | 1.36        | 0.25        |  |
| Race                        | 0.18        | 0.67        |  |

|                     |      |      |
|---------------------|------|------|
| Ethnicity           | 0.44 | 0.51 |
| Time Between Visits | 1.38 | 0.24 |
| Lean Mass           | 2.37 | 0.13 |
| Adiposity           | 0.47 | 0.50 |

Group was operationalized as No Pandemic (0) and Pandemic (1).

**Table S7.** Change in Percent Calories from Fiber Consumed with Covariates.

| Fully Adjusted Model  |             |             |
|-----------------------|-------------|-------------|
|                       | F           | <i>p</i>    |
| Model                 | 0.73        | 0.68        |
| <b>Group</b>          | <b>0.07</b> | <b>0.79</b> |
| Age                   | 0.53        | 0.47        |
| Sex assigned at Birth | 0.01        | 0.92        |
| Height                | 0.97        | 0.33        |
| Race                  | 0.04        | 0.85        |
| Ethnicity             | 0.76        | 0.38        |
| Time Between Visits   | 0.02        | 0.90        |
| Lean Mass             | 0.70        | 0.40        |
| Adiposity             | 2.47        | 0.12        |

Group was operationalized as No Pandemic (0) and Pandemic (1).

**Table S8.** Change in Percent Calories from Sugar Consumed with Covariates.

| Fully Adjusted Model  |             |             |
|-----------------------|-------------|-------------|
|                       | F           | <i>p</i>    |
| Model                 | 1.29        | 0.25        |
| <b>Group</b>          | <b>0.25</b> | <b>0.62</b> |
| Age                   | 0.13        | 0.72        |
| Sex assigned at Birth | 2.00        | 0.16        |
| Height                | 1.30        | 0.26        |
| Race                  | 0.09        | 0.77        |
| Ethnicity             | 0.53        | 0.47        |
| Time Between Visits   | 1.35        | 0.25        |
| Lean Mass             | 3.10        | 0.08        |
| Adiposity             | <0.01       | 0.97        |

Group was operationalized as No Pandemic (0) and Pandemic (1).

**Table S9.** Change in Percent Calories from Saturated Fatty Acids Consumed with Covariates.

| Fully Adjusted Model  |             |             |
|-----------------------|-------------|-------------|
|                       | F           | <i>p</i>    |
| Model                 | 1.24        | 0.28        |
| <b>Group</b>          | <b>0.05</b> | <b>0.83</b> |
| Age                   | 0.07        | 0.79        |
| Sex assigned at Birth | <0.01       | 0.97        |
| Height                | 0.13        | 0.72        |
| Race                  | 0.19        | 0.67        |
| Ethnicity             | 3.77        | 0.07        |
| Time Between Visits   | 0.99        | 0.32        |
| Lean Mass             | 0.08        | 0.78        |
| Adiposity             | 3.91        | 0.05        |

Group was operationalized as No Pandemic (0) and Pandemic (1).

**Table S10.** Change in Percent Calories from Monounsaturated Fatty Acids Consumed with Co-variates.

| <b>Fully Adjusted Model</b> |             |                 |
|-----------------------------|-------------|-----------------|
|                             | <b>F</b>    | <b><i>p</i></b> |
| Model                       | 1.66        | 0.12            |
| <b>Group</b>                | <b>1.02</b> | <b>0.31</b>     |
| Age                         | 0.01        | 0.91            |
| Sex assigned at Birth       | 0.02        | 0.90            |
| Height                      | 0.05        | 0.82            |
| Race                        | 2.55        | 0.11            |
| Ethnicity                   | 2.56        | 0.11            |
| Time Between Visits         | 0.25        | 0.62            |
| Lean Mass                   | 0.03        | 0.87            |
| Adiposity                   | 5.45        | 0.02*           |

Group was operationalized as No Pandemic (0) and Pandemic (1). \*Significance assuming  $\alpha=0.05$ .
